# Supplementary material for: Electrochemical maps and movies of the hydrogen evolution reaction on natural crystals of molybdenite (MoS2): basal vs. edge plane activity
Source: PubMed Central journal article supplement (PMC5627349; doi:10.1039/c7sc02545a), 2017-07-26
Supplement: SC-008-C7SC02545A-s001.pdf [file SC-008-C7SC02545A-s001.pdf]

*Supporting Information (SI) for:*

Electrochemical Maps and Movies of the Hydrogen  
Evolution Reaction on Natural Crystals of  
Molybdenite (MoS<sub>2</sub>): Basal vs. Edge Plane Activity

*Cameron L. Bentley<sup>a,\*</sup>, Minkyung Kang<sup>a</sup>, Faduma M. Maddar<sup>a</sup>, Fengwang Li<sup>b</sup>, Marc Walker<sup>c</sup>,  
Jie Zhang<sup>b</sup> and Patrick R. Unwin<sup>a,\*</sup>*

<sup>a</sup>Department of Chemistry, University of Warwick, Coventry CV4 7AL, U.K.

<sup>b</sup>School of Chemistry and Australian Research Council Centre of Excellence for  
Electromaterials Science, Monash University, Clayton, Vic 3800, Australia

<sup>c</sup>Department of Physics, University of Warwick, Coventry CV4 7AL, U.K.

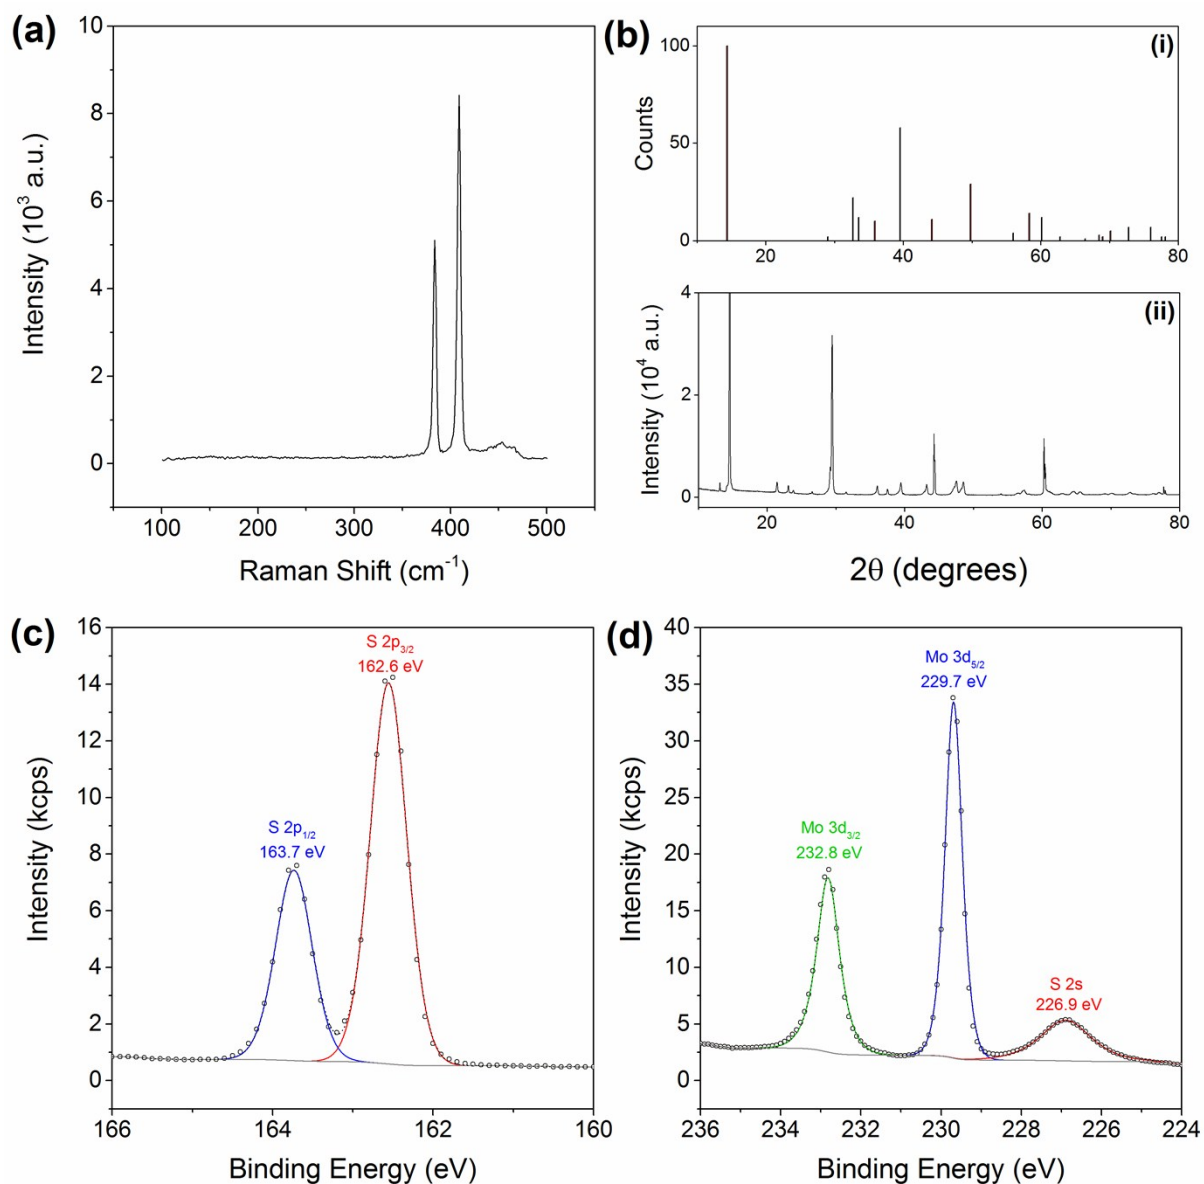

**Figure S1.** (a) Raman, (b) XRD [(i) 2H MoS<sub>2</sub> PDF#37-1492 and (ii) experimental] and XPS [(c) S 2p and (d) Mo 3d] spectra obtained and XPS spectra obtained from a freshly exfoliated sample of bulk MoS<sub>2</sub>. Experimental ( $\circ$ ) and fitted (---) data are shown in (c) and (d).

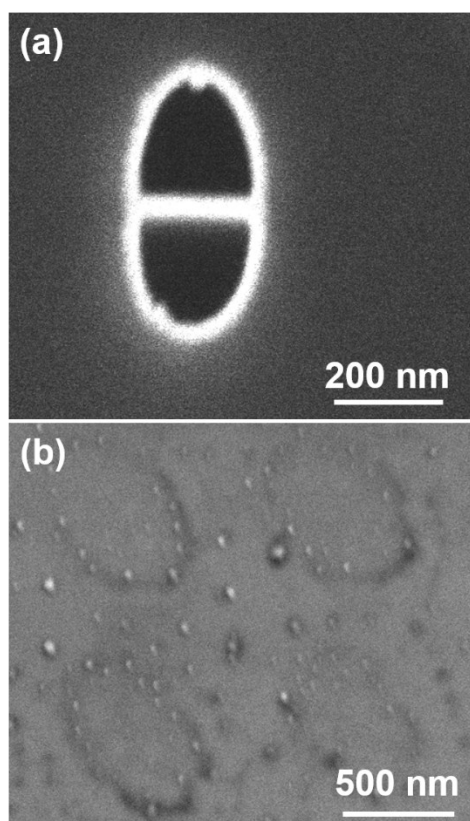

**Figure S2.** Scanning electron micrographs showing (a) the pulled end of a nanopipet probe ( $r_a \approx 250$  nm and  $r_b \approx 130$  nm) used during SECCM and (b) an example of droplet footprints left on the surface of a MoS<sub>2</sub> crystal after voltammetric SECCM scanning.

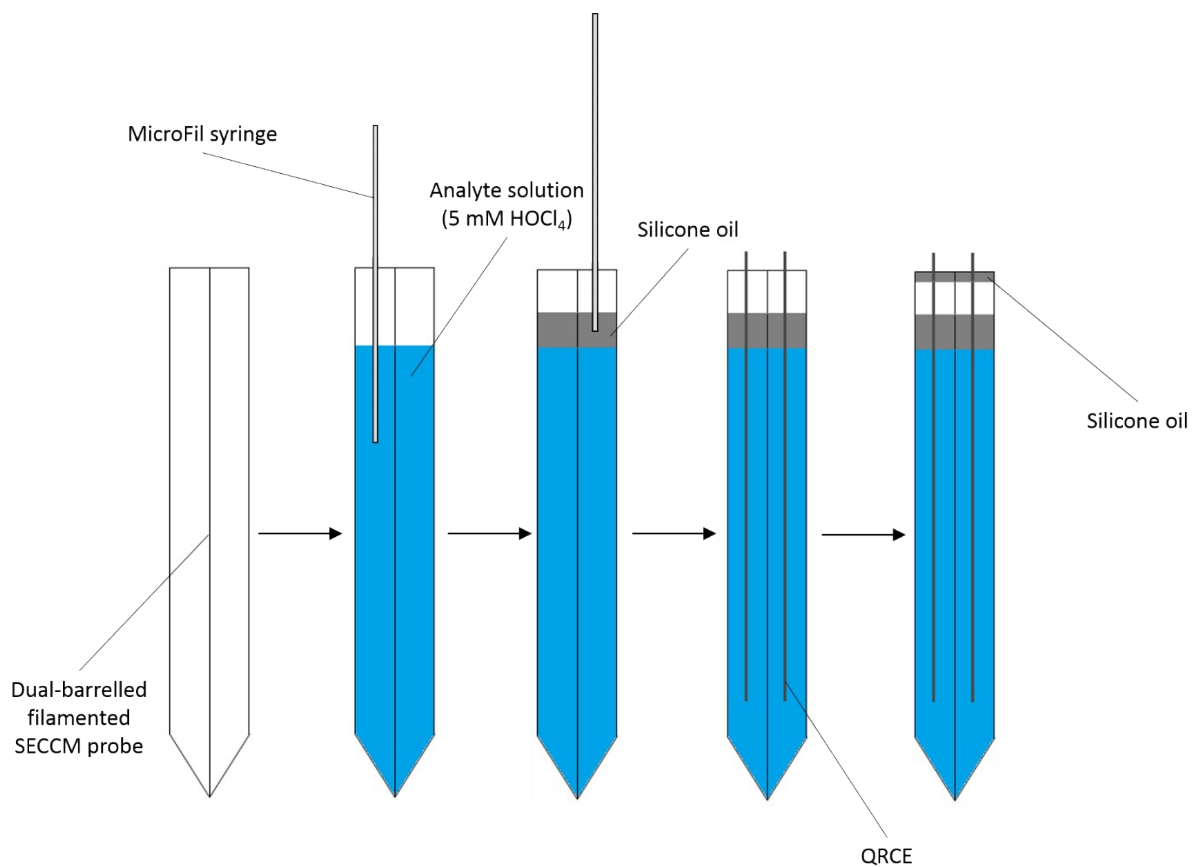

**Figure S3.** Schematic diagram showing the process used to fill the nanopipet probes employed during SECCM. A layer of silicone oil was added on top of the analyte solution to prevent the filamented probe from “drying out” during prolonged scanning.

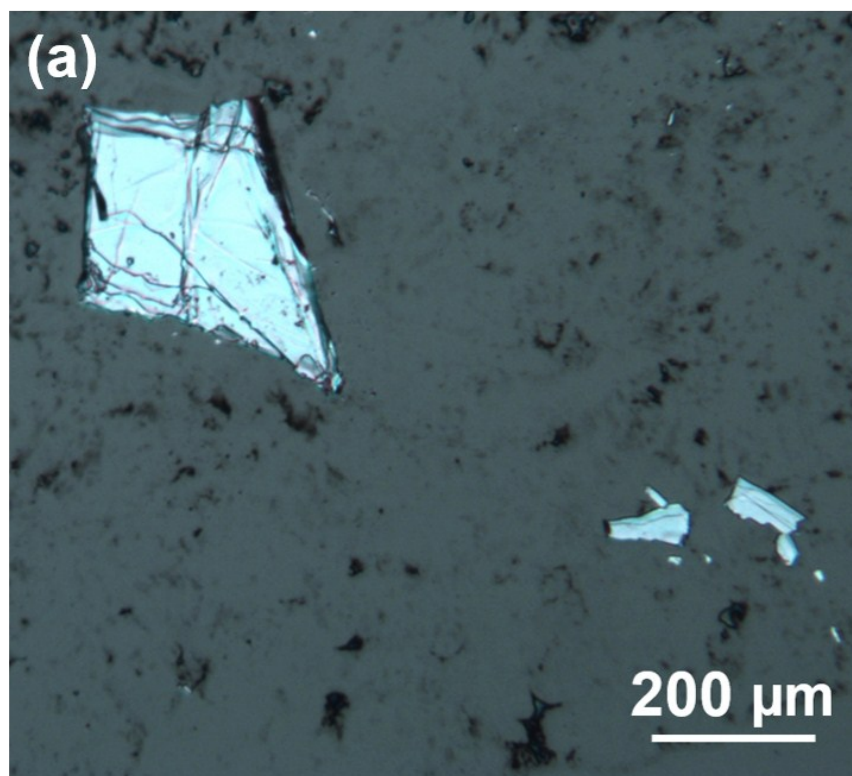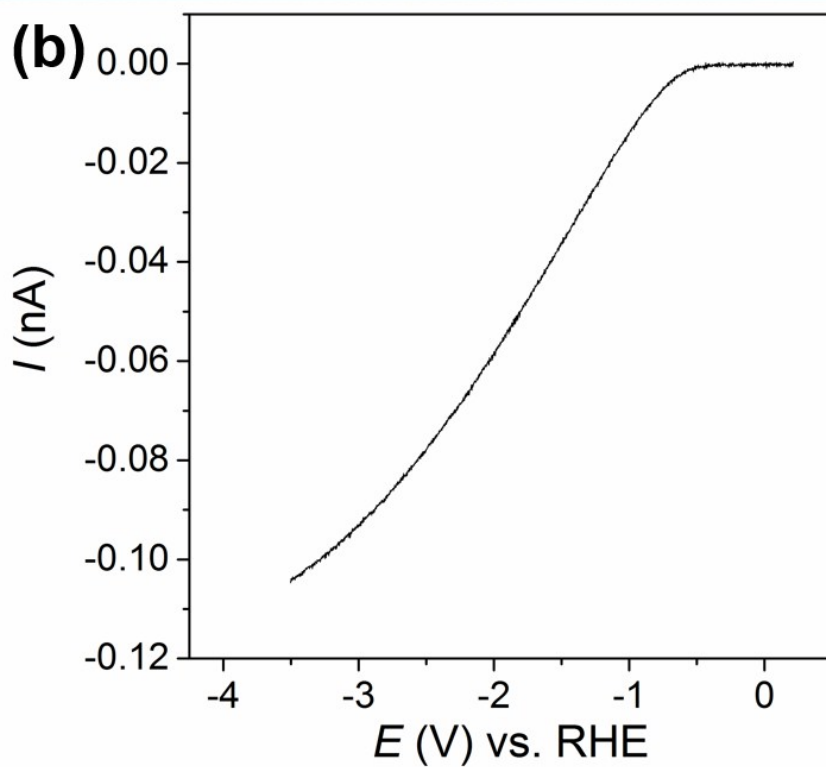

**Figure S4.** (a) Optical micrograph showing pieces of a MoS<sub>2</sub> crystal physisorbed on a GC substrate. (b) LSV ( $\nu = 1 \text{ V s}^{-1}$ ,  $E_{\text{bias}} = +0.1 \text{ V}$ ) obtained from 3 mM HClO<sub>4</sub> on the MoS<sub>2</sub>/GC substrate shown in (a).

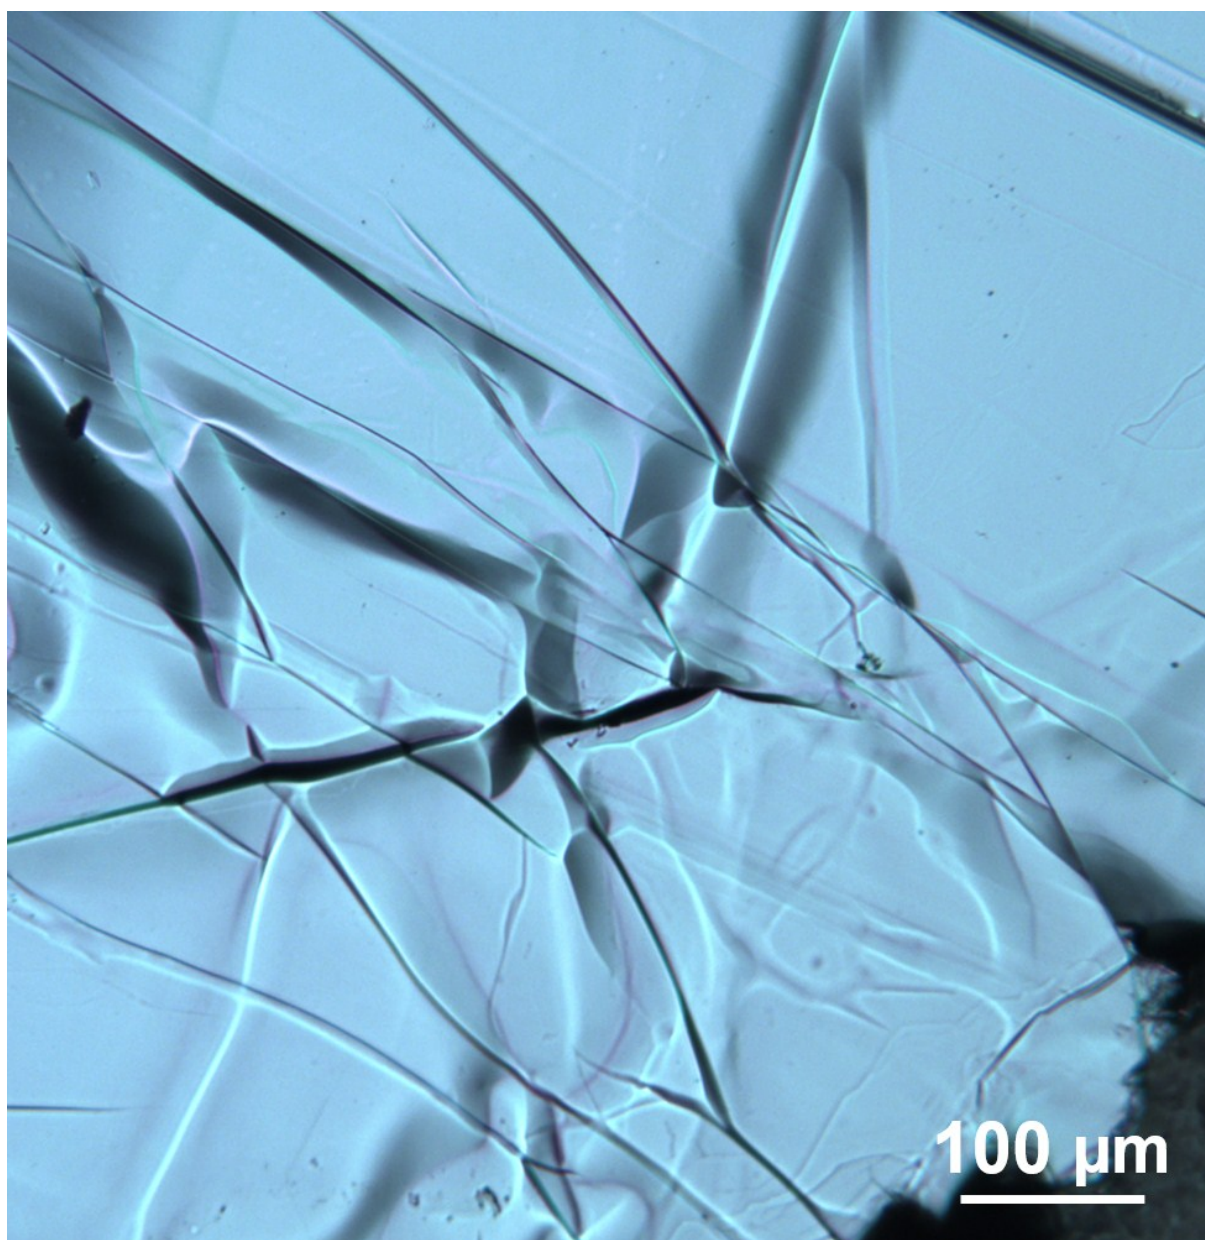

**Figure S5.** Optical micrograph of a bulk MoS<sub>2</sub> substrate after cleavage.

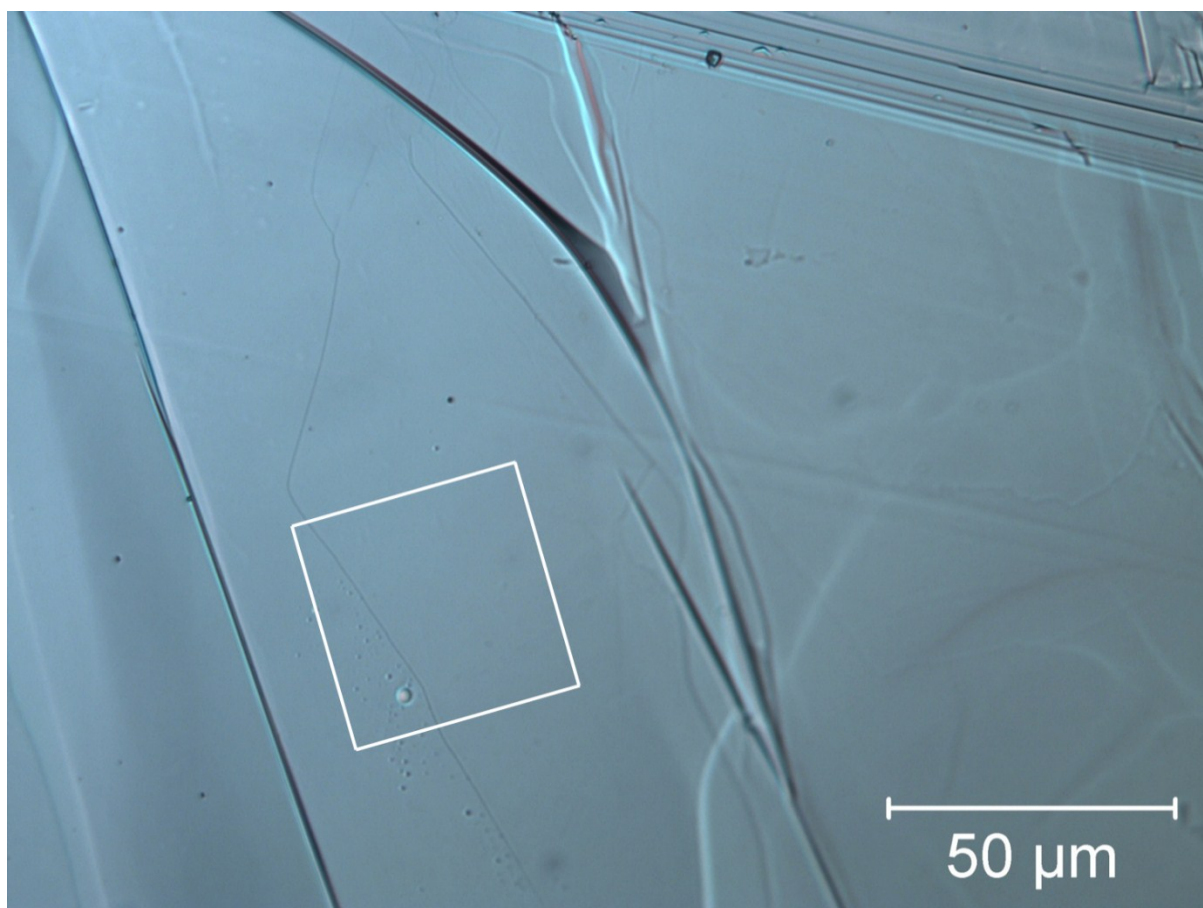

**Figure S6.** Optical micrograph showing the  $40\times 40\ \mu\text{m}$  area scanned by voltammetric SECCM, as shown in Figure 2a of the main text.

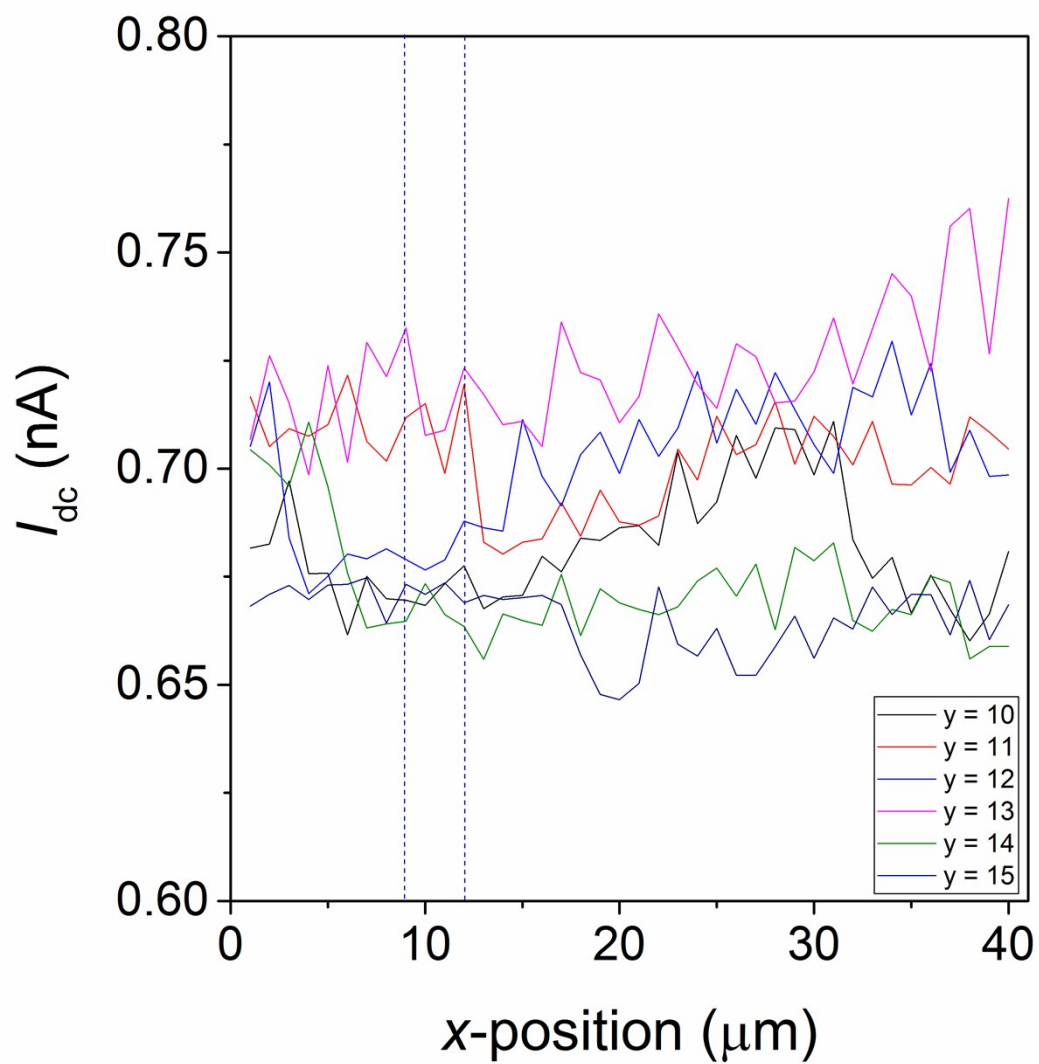

**Figure S7.** Line profiles ( $y = 10$  to  $15$ ) of the *dc* ion conductance current (at  $-0.15$  V vs. RHE) versus the *x*-position. The blue lines indicated on the plot delineate the area in which a major surface defect [defect **(i)**, see Figure 2 of the main text] is located.



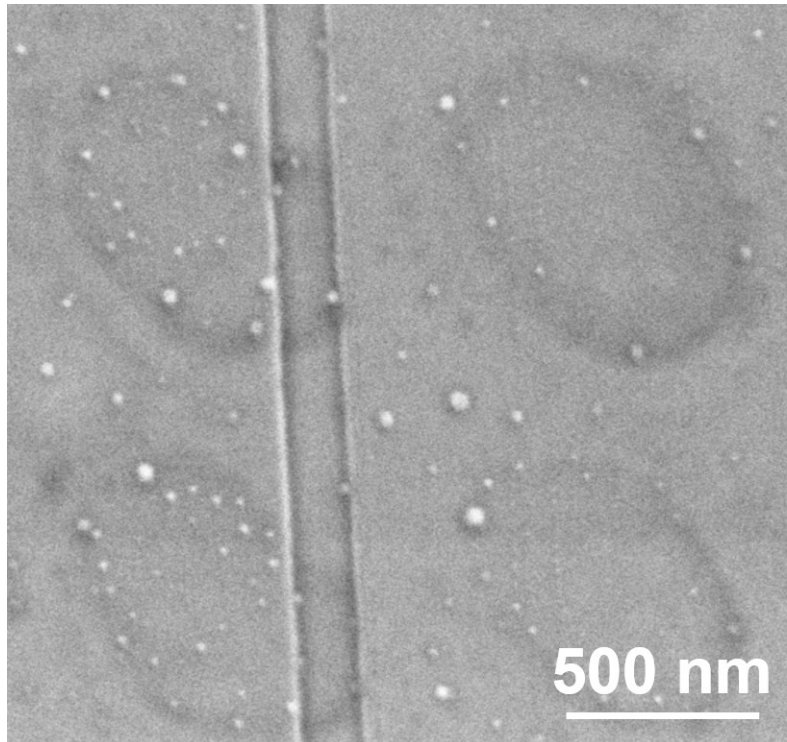

**Figure S8.** Scanning electron micrograph of droplet footprints left on the surface of bulk MoS<sub>2</sub> after voltammetric SECCM scanning, as shown in Figure 2a of the main text. Overlap of scanned areas with the major defect [defect (i) in Figure 2] is evident in this image.

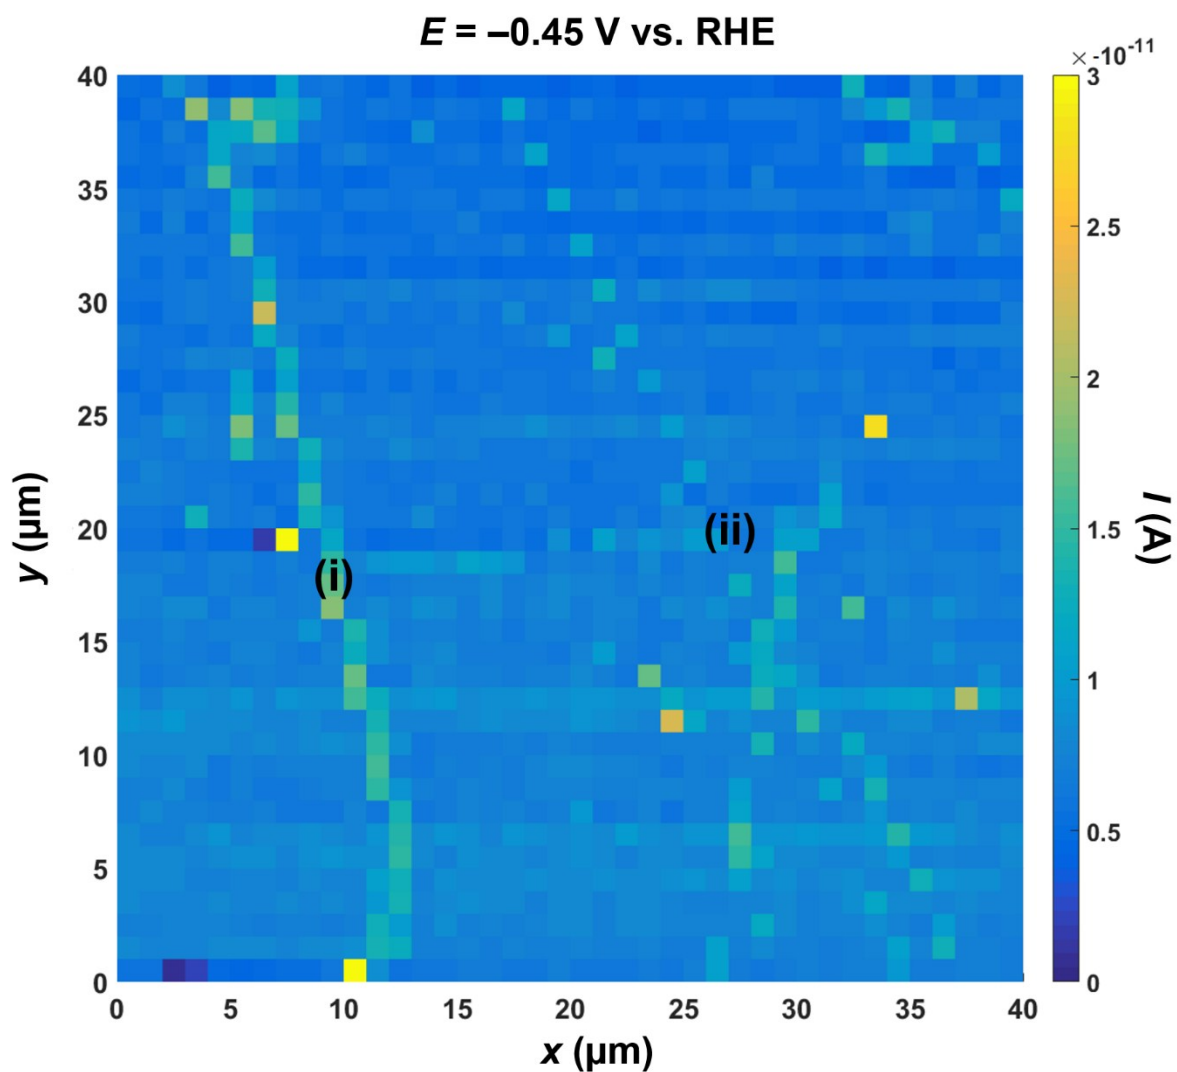

**Figure S9.**  $40 \times 40 \mu\text{m}$  spatially resolved current map (equipotential image) obtained at  $-0.45 \text{ V vs. RHE}$  (see Movie S1 for full potential range). Major and minor surface defects are labelled as **(i)** and **(ii)**, respectively. The following conditions were used during the scan:  $[\text{HClO}_4] = 5 \text{ mM}$ ,  $\nu = 0.5 \text{ V s}^{-1}$ ,  $E_b = +0.2 \text{ V}$ ,  $r_a = 275 \text{ nm}$  and  $r_b = 125 \text{ nm}$ .

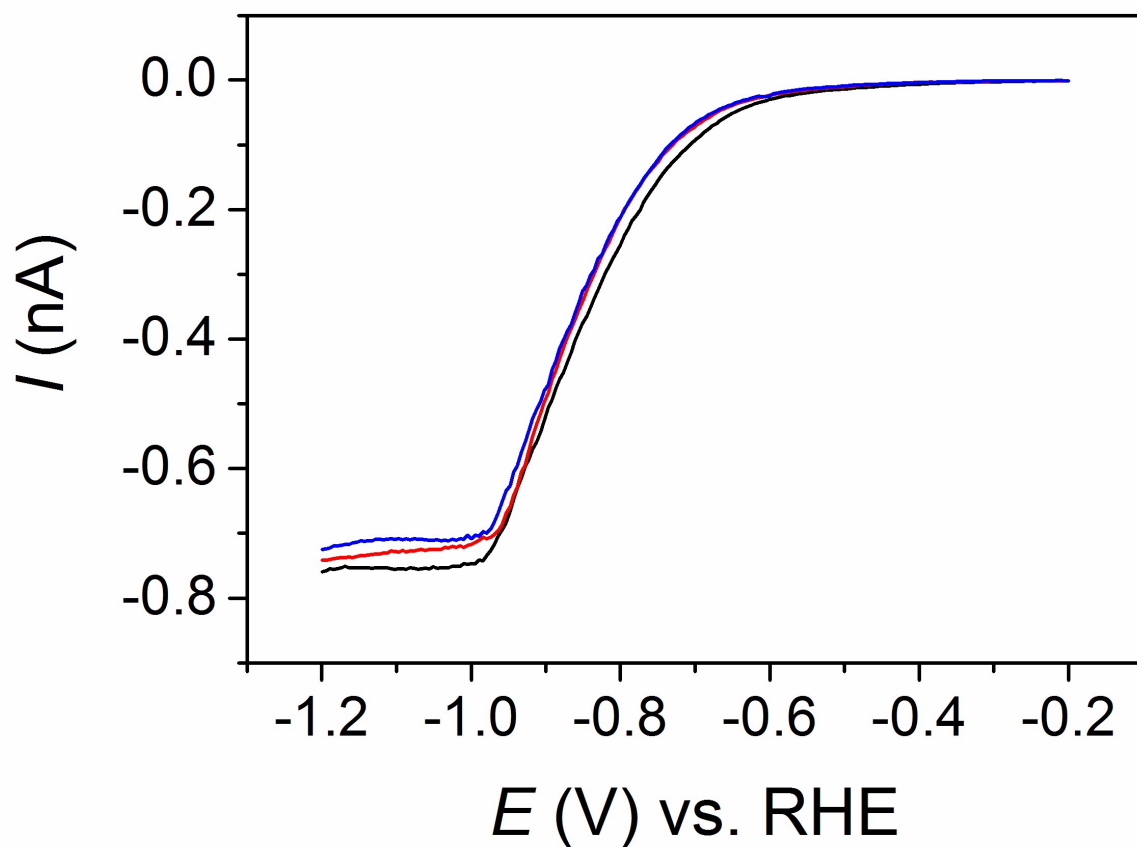

**Figure S10.** LSVs taken from the start (black trace,  $y = 3$ ), middle (red trace,  $y = 22$ ) and end (blue trace,  $y = 39$ ) of the voltammetric SECCM scan shown in Figure 2 of the main text. Each LSV is the average of five measurements. The following conditions were used during the scan:  $[\text{HClO}_4] = 5 \text{ mM}$ ,  $\nu = 0.5 \text{ V s}^{-1}$ ,  $E_b = +0.2 \text{ V}$ ,  $r_a = 275 \text{ nm}$  and  $r_b = 125 \text{ nm}$ .

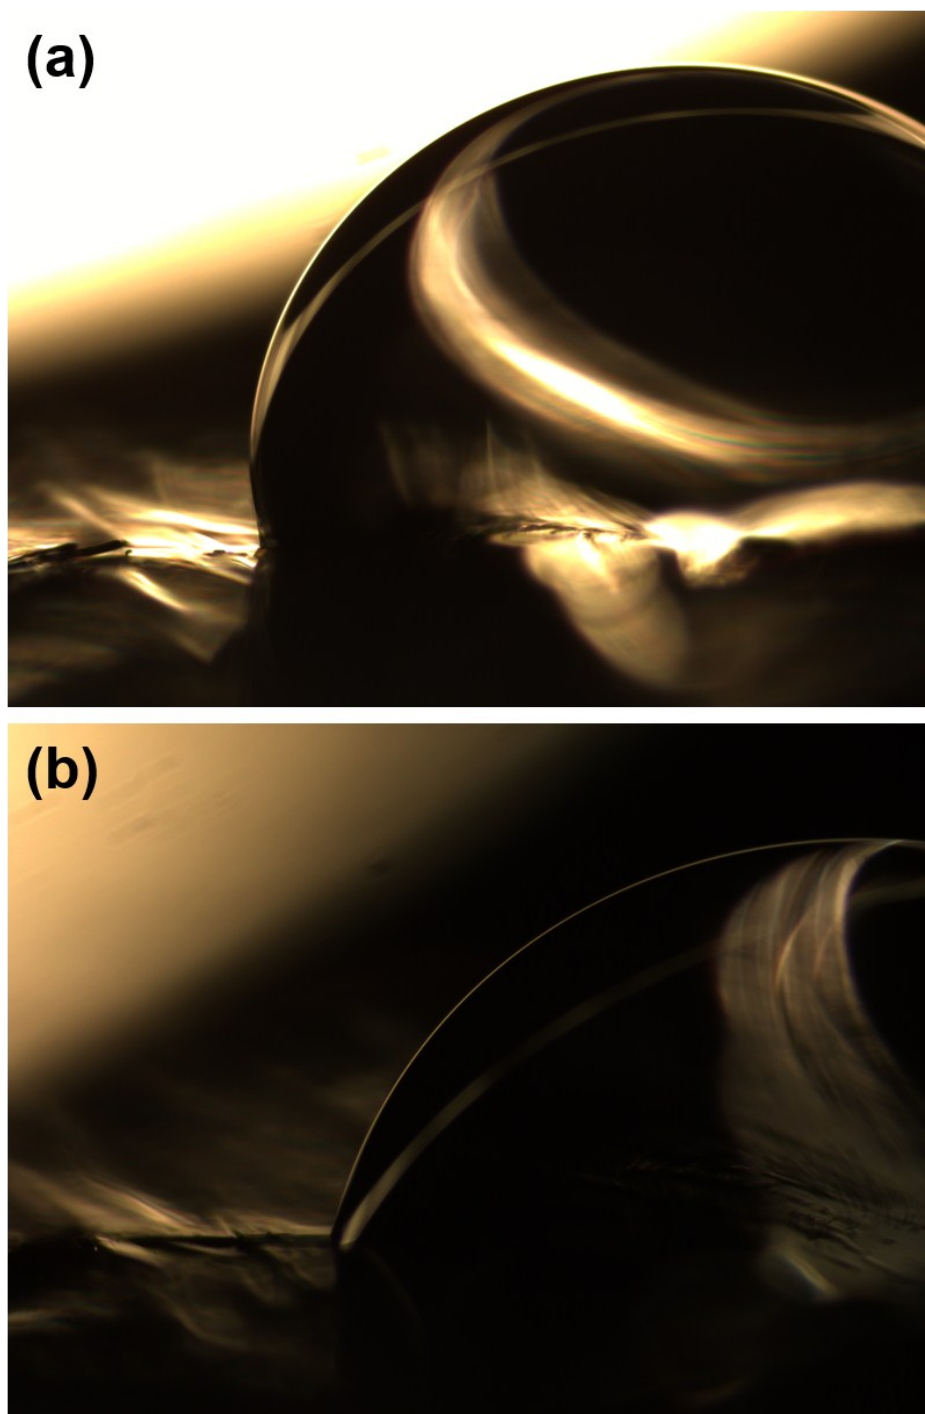

**Figure S11.** Images of a 10  $\mu\text{L}$  water droplet atop an aged MoS<sub>2</sub> surface (a) before and (b) after voltammetric cycling between +0.6 and  $-1.9$  V vs. RHE at a scan rate of  $0.05$  V s<sup>-1</sup>. The WCA is  $98^\circ$  and  $73^\circ$  in (a) and (b), respectively.

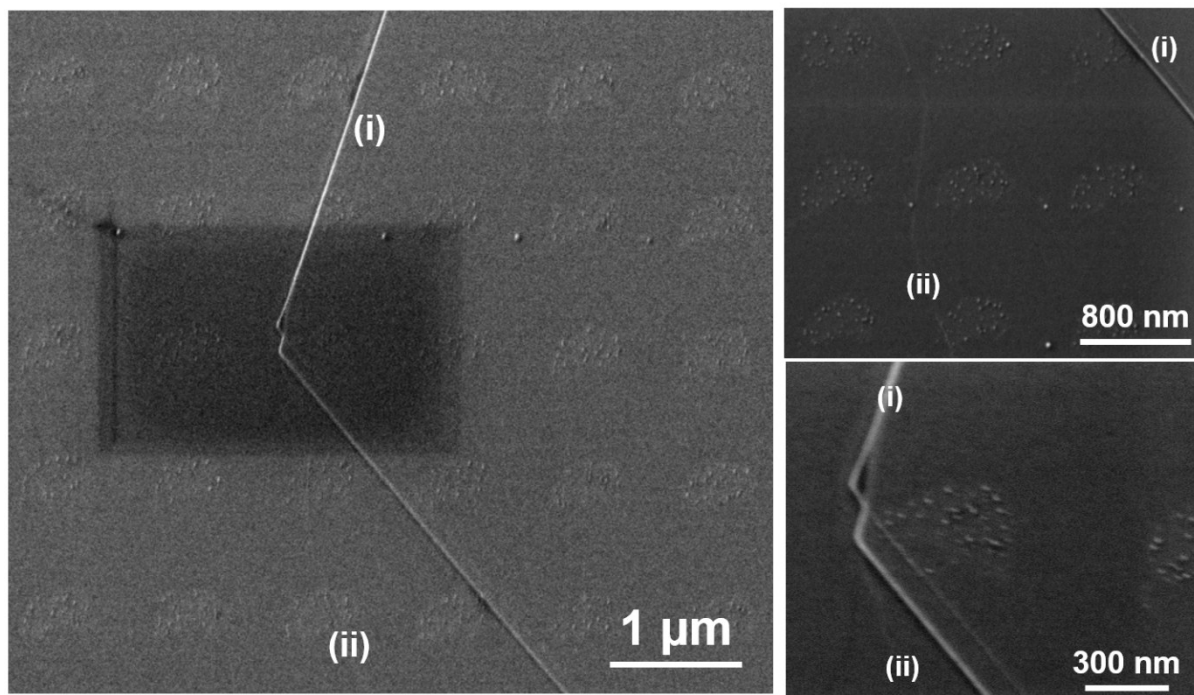

**Figure S12.** Scanning electron micrographs of the surface of bulk MoS<sub>2</sub> after voltammetric SECCM scanning, as shown in Figure 3a of the main text. Major and minor surface defects are labelled as (i) and (ii), respectively.

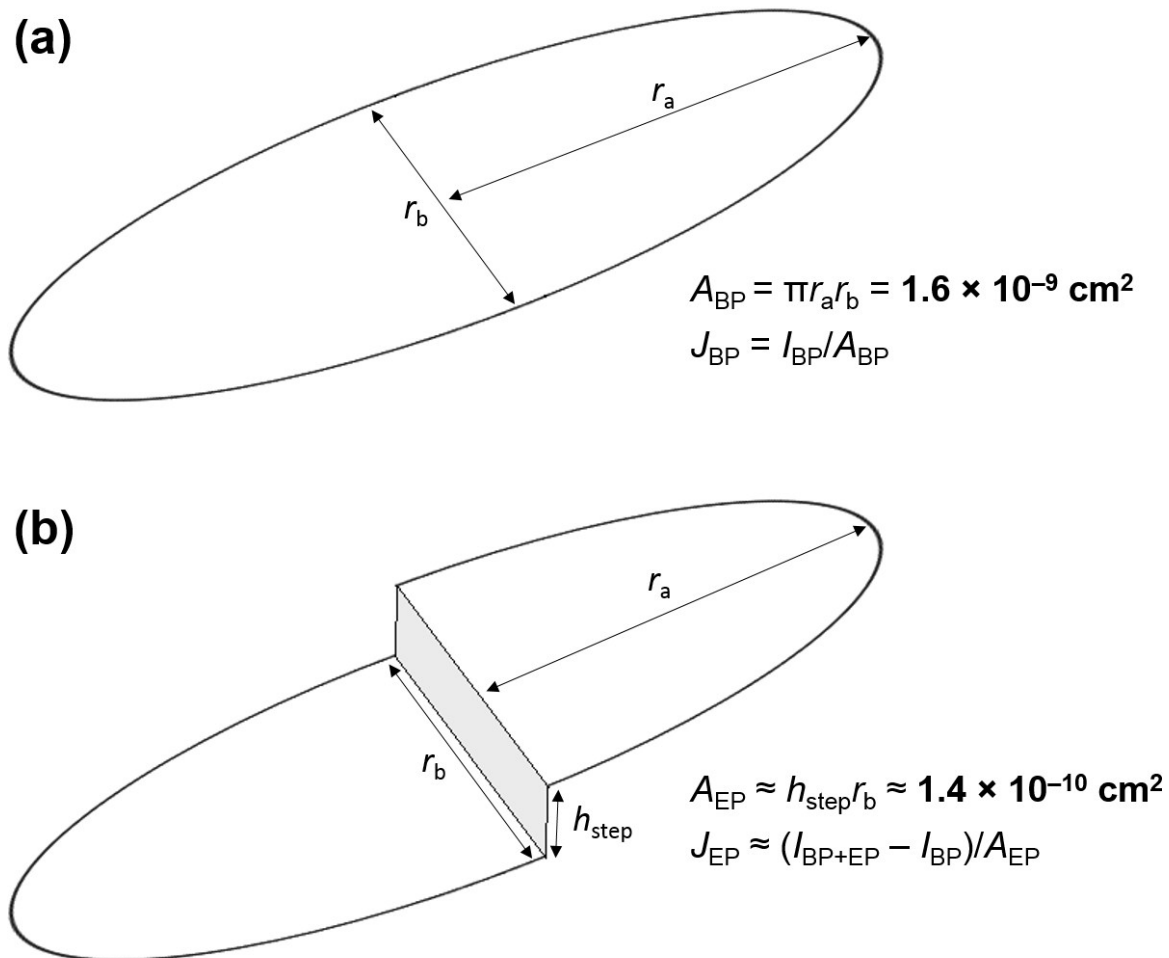

**Figure S13.** Schematic diagram showing the probed region of the SECCM droplet cell in an area containing (a) pure basal plane and (b) predominantly basal plane plus a surface defect. Also shown is the calculations for the active electrode area ( $A$ ) and current density ( $J$ ) associated with the basal plane (subscript BP) and edge plane (subscript EP). The area calculated in (b) corresponds to defect (i) in Figure 3 of the main text.

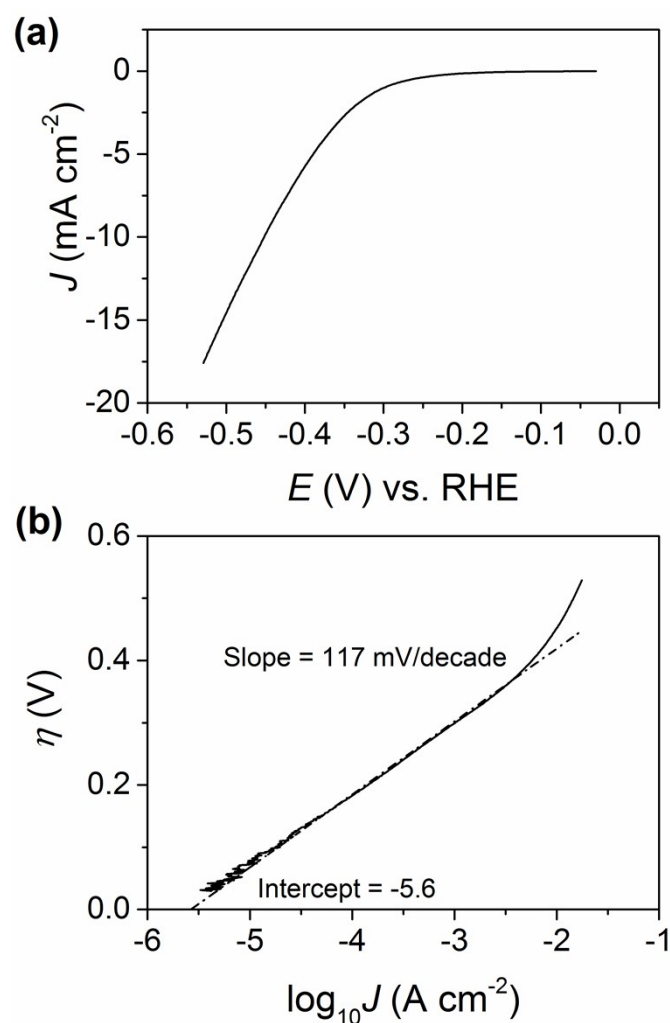

**Figure S14.** A (a) LSV (area-normalized) and (b) Tafel plot obtained from the HER on the MoS<sub>2</sub> basal plane (average of 222 measurements). The slope and intercept of the dashed line shown in (b) was used to estimate the Tafel slope and  $J_0$ , respectively (indicated on the plot). The following parameters were used to collect these data:  $[\text{HClO}_4] = 100 \text{ mM}$ ,  $\nu = 7.5 \text{ mV s}^{-1}$ ,  $E_b = +0.05 \text{ V}$ ,  $r_a = 250 \text{ nm}$  and  $r_b = 130 \text{ nm}$ .

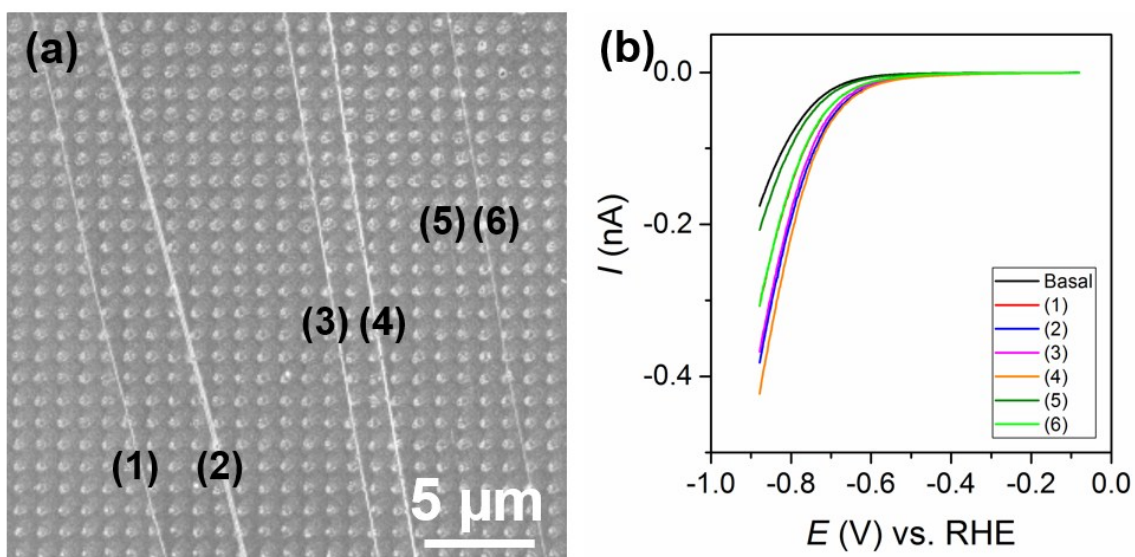

**Figure S15.** (a) A scanning electron micrograph of the surface of bulk MoS<sub>2</sub> after voltammetric SECCM scanning (26×26 μm area), as shown in Figure 5a of the main text. (b) Representative LSVs obtained from the basal plane and defects **(1)** to **(6)**, as indicated in (a). The following parameters were used in (b): [HClO<sub>4</sub>] = 100 mM,  $\nu = 0.25 \text{ V s}^{-1}$ ,  $E_b = +0.05 \text{ V}$ ,  $r_a = 220 \text{ nm}$  and  $r_b = 110 \text{ nm}$ .
